# Supplementary material
Source: MDPI journal article supplement (https://www.mdpi.com/2311-7524/7/10/367)
Supplement: s1 [file s1 › horticulturae-1381506-supplementary.pdf]

# Supplementary Materials: Improving Phenolic Bioactive-Linked Functional Qualities of Sweet Potatoes Using Beneficial Lactic Acid Bacteria-Based Biotransformation Strategy

Pradeepika Chintha <sup>1,2</sup>, Dipayan Sarkar <sup>1</sup>, Kenneth Pecota <sup>3</sup>, Munevver Dogramaci <sup>4</sup> and Kalidas Shetty <sup>1,\*</sup>

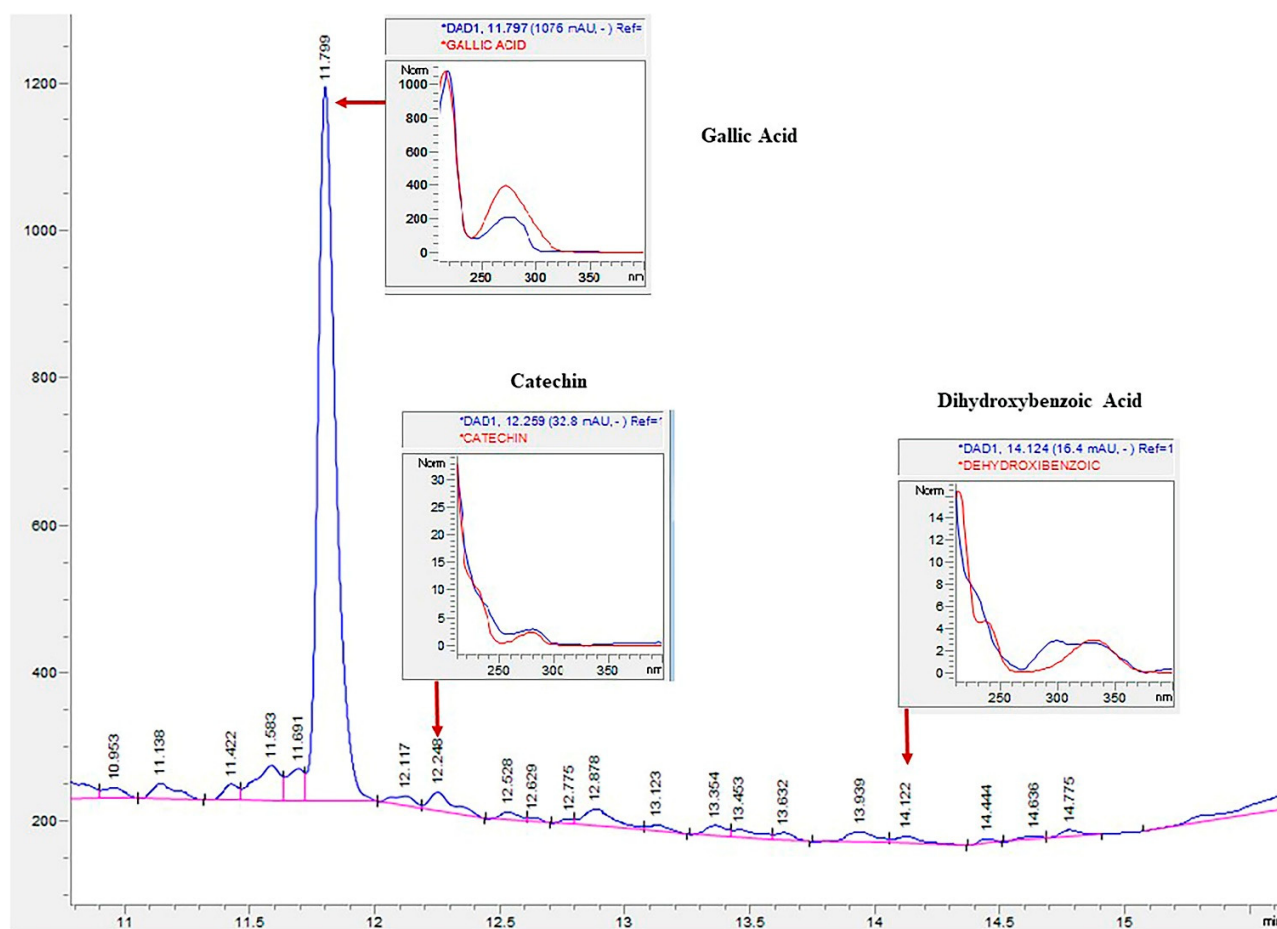

**Figure S1.** Chromatogram (High Performance Liquid Chromatography Analysis) of unfermented sweet potato (Murasaki) extracts at 0 h fermentation time point. Detected phenolics were gallic acid, catechin, and dihydroxybenzoic acid.

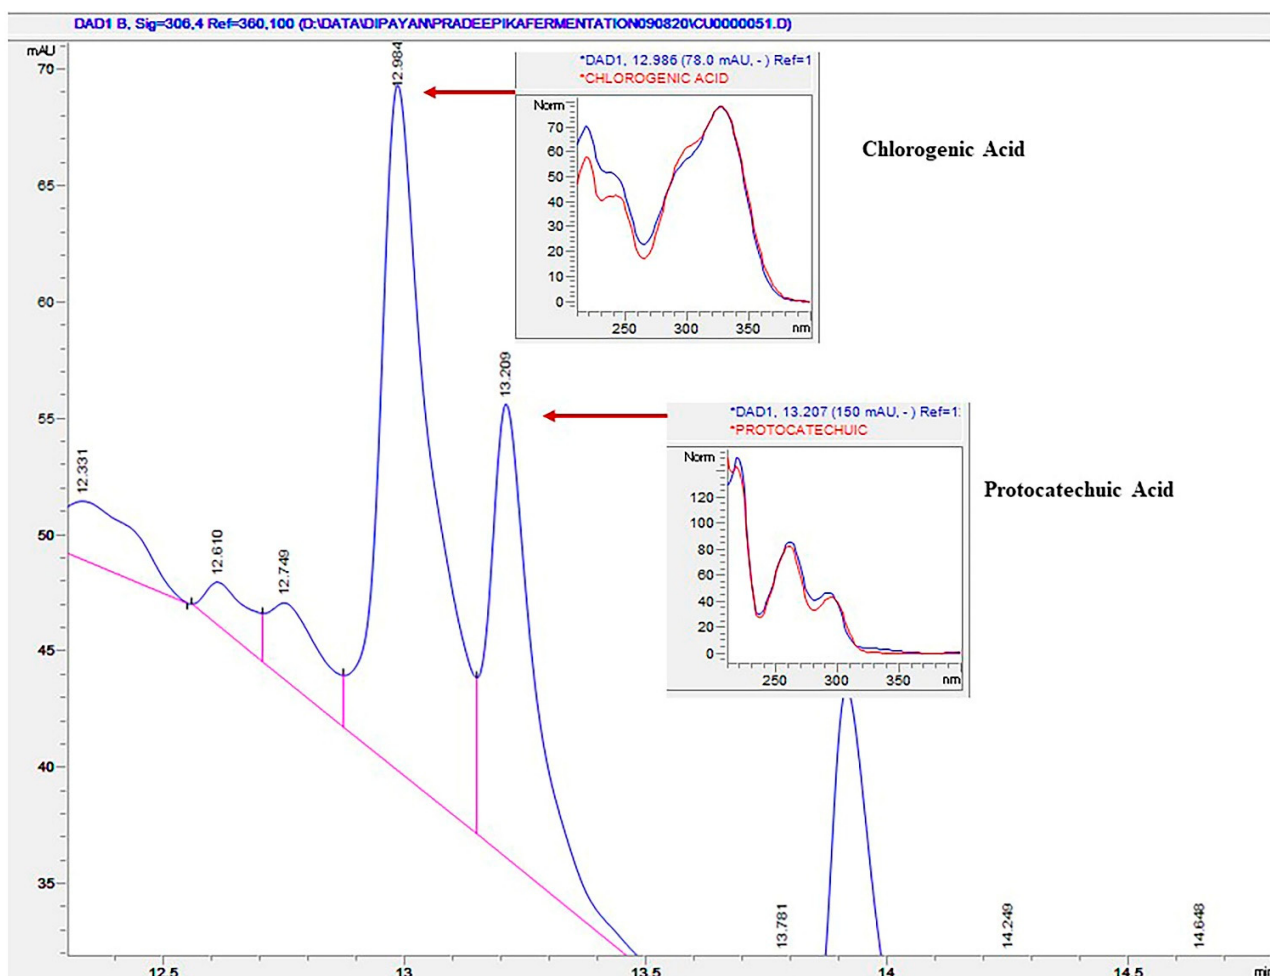

**Figure S2.** Chromatogram (High Performance Liquid Chromatography Analysis) of unfermented sweet potato (NIC-413) extracts at 0 h fermentation time point. Detected phenolics were chlorogenic acid and protocatechuic acid.
